# Supplementary material for: MANF protects human pancreatic beta cells against stress-induced cell death
Source: Diabetologia. 2018 Jul 21;61(10):2202–14. doi: 10.1007/s00125-018-4687-y (PMC6133171; doi:10.1007/s00125-018-4687-y)
Supplement: Supplementary file 2 — (XLSX 43 kb) [file 125_2018_4687_MOESM2_ESM.xlsx]

## Sheet: Sheet1
	Cytokines W/O MANF		CYTOKINES W/ MANF
gene	LogFC	FDR	LogFC	FDR	FC ChangeBi-directional	Total FC Change	Percent change	Total FC
KRT5	-5.29987	3.56e-05	1.11558	0.259178	6.41545	6.41545	121.049	-4.18429
SREBF1	-5.24924	8.46e-12	0.637064	0.204422	5.8863	5.8863	112.136	-4.61217
PDZD2	2.65058	0.000109337	-2.94716	0.00104633	-5.59774	5.59774	211.189	-0.296581
TMEM185B	2.1582	0.00887835	-3.1195	0.000900094	-5.27771	5.27771	244.542	-0.961299
UNC79	-5.27361	3.4e-09	-0.0381585	0.951381	5.23545	5.23545	99.2764	-5.31176
EHD2	-5.48509	2.84e-08	-0.39877	0.757666	5.08632	5.08632	92.7299	-5.88386
RAPGEF5	-2.56391	0.011458	2.4758	0.00378744	5.03971	5.03971	196.563	-0.0881188
ZC3H4	-4.33364	3.36e-07	0.687445	0.247985	5.02109	5.02109	115.863	-3.6462
AGO1	2.46262	0.000162253	-2.4497	0.00513134	-4.91233	4.91233	199.475	0.0129178
HIP1	-3.59403	0.000600792	1.30929	0.153007	4.90332	4.90332	136.429	-2.28475
ATP2B1	-4.6507	6.87e-07	0.216222	0.79237	4.86692	4.86692	104.649	-4.43448
CNFN	-5.43002	1.84e-09	-0.579773	0.438963	4.85025	4.85025	89.3228	-6.00979
CGN	-2.95973	0.00418524	1.73418	0.0410757	4.69391	4.69391	158.593	-1.22555
SNAI1	-3.89306	9.82e-05	0.791699	0.339748	4.68476	4.68476	120.336	-3.10136
LOC100288842	-5.54448	4.26e-09	-0.866153	0.300861	4.67833	4.67833	84.3781	-6.41064
PPP1R13B	-3.67273	5.85e-05	0.999079	0.133938	4.67181	4.67181	127.203	-2.67365
ARHGEF16	-3.99939	8.4e-06	0.643059	0.347649	4.64245	4.64245	116.079	-3.35634
PHLDB1	-4.83093	9.5e-06	-0.288023	0.846869	4.5429	4.5429	94.0379	-5.11895
SULF2	-3.90744	1.91e-05	0.605571	0.389131	4.51301	4.51301	115.498	-3.30187
CTSK	-4.86294	2.06e-11	-0.394493	0.485403	4.46845	4.46845	91.8878	-5.25743
LTF	-2.35582	0.0219086	2.10572	0.0201734	4.46154	4.46154	189.384	-0.250098
PPP1R37	-5.52286	4.31e-05	-1.08289	0.410725	4.43997	4.43997	80.3926	-6.60575
PDE8B	-5.40463	7.39e-07	-1.01005	0.318824	4.39457	4.39457	81.3113	-6.41468
NARS2	-4.47152	9.27e-07	-0.0814889	0.941485	4.39004	4.39004	98.1776	-4.55301
HOMER2	-3.69801	0.000499713	0.688777	0.454227	4.38679	4.38679	118.626	-3.00923
FAM86EP	-2.77135	0.00598477	1.60236	0.0429008	4.37371	4.37371	157.819	-1.16899
LOC100272217	-4.68029	2.67e-06	-0.313128	0.715077	4.36716	4.36716	93.3097	-4.99342
ORAI3	-4.11632	4.25e-05	0.229044	0.793029	4.34536	4.34536	105.564	-3.88727
MAP3K15	-5.16965	8.35e-09	-0.853723	0.253172	4.31593	4.31593	83.4859	-6.02338
TEF	-4.54499	3.02e-05	-0.295405	0.753059	4.24958	4.24958	93.5004	-4.84039
TMEM91	-4.16836	1.21e-05	0.027022	0.957949	4.19538	4.19538	100.648	-4.14134
ELK4	-5.08457	3.26e-07	-0.891099	0.450223	4.19347	4.19347	82.4744	-5.97566
UHRF1BP1	-3.7766	0.000516927	0.381488	0.767995	4.15808	4.15808	110.101	-3.39511
ADCY2	-2.75976	0.0103195	1.39389	0.152837	4.15365	4.15365	150.508	-1.36587
MFSD1	-2.21655	0.0405114	1.93443	0.0222895	4.15098	4.15098	187.272	-0.282117
ZBTB47	-4.05762	4.41e-05	0.0891381	0.99891	4.14675	4.14675	102.197	-3.96848
NDUFA6-AS1	-2.97976	0.00269599	1.16613	0.171004	4.1459	4.1459	139.135	-1.81363
CTDSPL	-4.84697	1.85e-08	-0.776535	0.219734	4.07044	4.07044	83.979	-5.62351
C14orf105	-5.06161	8.35e-09	-1.01183	0.12019	4.04978	4.04978	80.0097	-6.07345
MED22	-2.7497	0.00948607	1.26685	0.213599	4.01655	4.01655	146.072	-1.48285
ADM2	3.17183	0.00542654	-0.805319	0.350308	-3.97715	3.97715	125.39	2.36651
NPEPL1	-4.4202	1.21e-06	-0.452732	0.576582	3.96747	3.96747	89.7577	-4.87293
FLJ44511	-4.82782	4.92e-09	-0.867898	0.152837	3.95992	3.95992	82.023	-5.69572
KIAA1324L	-3.53543	0.00184476	0.403151	0.685582	3.93859	3.93859	111.403	-3.13228
DHRS4L1	-4.03136	3.15e-05	-0.0988474	0.953976	3.93251	3.93251	97.548	-4.1302
DQ582265	-6.49657	6.9e-07	-2.59345	0.041827	3.90312	3.90312	60.0797	-9.09002
NDUFAF6	-3.61536	0.000289677	0.276449	0.779773	3.89181	3.89181	107.647	-3.33892
RSPH9	-3.42486	0.000424112	0.465702	0.610639	3.89056	3.89056	113.598	-2.95916
C5orf55	-4.06011	8.51e-05	-0.17082	0.921738	3.88929	3.88929	95.7927	-4.23093
SREBF2	-3.11062	0.00360549	0.775409	0.42516	3.88603	3.88603	124.928	-2.33521
ZNF467	-2.38894	0.0324484	1.48631	0.117579	3.87525	3.87525	162.216	-0.902629
FBLN7	-2.95356	0.00120898	0.911381	0.269702	3.86494	3.86494	130.857	-2.04218
EFCAB6	-2.01814	0.0145566	1.80633	0.000262632	3.82447	3.82447	189.505	-0.211813
PEG3,ZIM2	-4.34912	8.21e-06	-0.542207	0.493859	3.80692	3.80692	87.5329	-4.89133
GLS2	-4.26371	8.7e-07	-0.461967	0.510883	3.80174	3.80174	89.1651	-4.72568
NADKD1	-3.2808	0.000412664	0.512824	0.573636	3.79363	3.79363	115.631	-2.76798
LOC100132354	-2.8085	6.82e-05	0.962194	0.114669	3.77069	3.77069	134.26	-1.84631
ZNF614	-3.79156	0.000206665	-0.0351164	0.999377	3.75644	3.75644	99.0738	-3.82667
GSTA2	-6.95377	1.51e-22	-3.22114	1.08e-11	3.73263	3.73263	53.6778	-10.1749
CCM2	-3.19231	0.000887191	0.478844	0.575463	3.67115	3.67115	115	-2.71346
LDHD	-3.41108	0.000383109	0.246	0.797091	3.65708	3.65708	107.212	-3.16508
SEZ6L	-3.75341	0.000135975	-0.108217	0.910409	3.64519	3.64519	97.1168	-3.86163
RACGAP1	-3.90399	5.22e-05	-0.276569	0.78621	3.62742	3.62742	92.9157	-4.18056
SLC43A1	-3.02203	0.00593755	0.603335	0.599666	3.62537	3.62537	119.965	-2.4187
JOSD2	-3.05866	0.00287296	0.552756	0.57863	3.61141	3.61141	118.072	-2.5059
EGR1	-2.82907	0.00759256	0.779124	0.434689	3.6082	3.6082	127.54	-2.04995
GTF3A	-4.09567	3.76e-05	-0.505489	0.620545	3.59018	3.59018	87.658	-4.60116
ZNF532	-2.38787	0.0202213	1.16364	0.212536	3.55152	3.55152	148.731	-1.22423
SETD8	-4.79018	1.7e-06	-1.25927	0.121352	3.53091	3.53091	73.7115	-6.04945
SSTR5-AS1	-4.9394	2.07e-09	-1.42362	0.0384021	3.51578	3.51578	71.1782	-6.36303
ZNF329	-4.91472	3.76e-05	-1.41404	0.159615	3.50068	3.50068	71.2284	-6.32876
FGF9	-4.43636	4.81e-07	-0.941263	0.169063	3.4951	3.4951	78.783	-5.37763
SRSF2	-3.12811	5.86e-06	0.357368	0.491059	3.48548	3.48548	111.424	-2.77074
ZNF180	-3.88107	0.000151069	-0.396318	0.690103	3.48475	3.48475	89.7884	-4.27739
TENM2	-4.83384	9.02e-07	-1.3757	0.0896333	3.45814	3.45814	71.5403	-6.20954
MIER3	-2.18844	0.0256731	1.26768	0.122489	3.45612	3.45612	157.926	-0.920761
HRAS	-2.56458	0.019643	0.842303	0.489113	3.40688	3.40688	132.844	-1.72227
AK057887	-1.80428	0.0188127	-5.20347	1.62e-09	-3.39919	3.39919	188.396	-7.00775
PPP1R36	-3.56838	4.22e-10	-0.169637	0.779561	3.39874	3.39874	95.2461	-3.73801
RALYL	-4.82461	1.02e-06	-1.42615	0.106748	3.39845	3.39845	70.4401	-6.25076
S100A8	2.23777	0.000656111	5.60581	1.25e-14	3.36803	3.36803	150.508	7.84358
PIK3R1	-5.28243	8.14e-07	-1.93878	0.0305553	3.34366	3.34366	63.2976	-7.22121
WEE2-AS1	-3.32928	0.00365142	0.010225	0.996758	3.33951	3.33951	100.307	-3.31906
MAP3K4	-4.33605	1.24e-05	-1.00889	0.227175	3.32717	3.32717	76.7326	-5.34494
MFAP4	-5.35382	2.21e-07	-2.03178	0.0131763	3.32205	3.32205	62.05	-7.3856
LOC100130899	-3.04308	0.00782165	0.273363	0.715269	3.31645	3.31645	108.983	-2.76972
EXPH5	-2.38236	0.00116506	0.93147	0.159301	3.31383	3.31383	139.099	-1.45089
ZNF527	-4.10364	0.000688471	-0.796437	0.558286	3.3072	3.3072	80.5919	-4.90007
EPG5	-4.34984	3.53e-10	-1.05529	0.0462395	3.29455	3.29455	75.7396	-5.40513
RERG	-5.15491	1.23e-11	-1.86879	0.00026604	3.28612	3.28612	63.7473	-7.02371
HAP1	-3.76961	7.41e-05	-0.491662	0.567586	3.27795	3.27795	86.9572	-4.26127
SERINC5	-1.86159	0.019123	-5.12687	3.84e-09	-3.26528	3.26528	175.402	-6.98847
KDM4B	-3.86451	6.14e-05	-0.605564	0.532436	3.25895	3.25895	84.3301	-4.47007
TK2	-2.58929	0.00113101	0.666589	0.274035	3.25588	3.25588	125.744	-1.9227
PLCB1	-4.44707	2.57e-05	-1.21225	0.222839	3.23482	3.23482	72.7405	-5.65931
SIDT2	-4.5203	7.06e-06	-1.2918	0.133808	3.2285	3.2285	71.4222	-5.8121
LINC00886	-2.87759	0.00432179	0.332233	0.788816	3.20983	3.20983	111.546	-2.54536
TNFSF15	1.5766	0.0249737	-1.61903	0.0420514	-3.19563	3.19563	202.691	-0.0424203
APOD	-3.47136	0.0105434	-0.283229	0.875439	3.18813	3.18813	91.841	-3.75459
TRADD	-1.90711	0.0474451	1.2714	0.164315	3.1785	3.1785	166.666	-0.63571
KIRREL3	-3.22761	7.88e-13	-0.0516345	0.900672	3.17597	3.17597	98.4002	-3.27924
SH2D3C	-3.18413	0.000474704	-0.0147419	0.987287	3.16939	3.16939	99.537	-3.19888
OLFM4	-8.11673	7.11e-30	-4.94789	8.56e-19	3.16883	3.16883	39.0408	-13.0646
VTN	-4.39009	2.84e-08	-1.2397	0.071109	3.15038	3.15038	71.7613	-5.62979
chr22:40672576-40672625,-	2.61188	0.0102267	5.76051	2.24e-08	3.14863	3.14863	120.55	8.37239
EIF4E1B	-3.54132	0.000486931	-0.41456	0.680142	3.12676	3.12676	88.2936	-3.95588
EFHD2	-3.6945	0.000704459	-0.584127	0.653062	3.11037	3.11037	84.1893	-4.27863
PYROXD2	-5.55637	1.17e-10	-2.46994	9.84e-05	3.08643	3.08643	55.5475	-8.02632
SLC6A4	-4.83317	2.62e-07	-1.76576	0.018986	3.06741	3.06741	63.4658	-6.59893
ST6GALNAC6	-3.13812	0.000440746	-0.0776746	0.957419	3.06045	3.06045	97.5248	-3.2158
ZNF577	-3.79871	3.71e-06	-0.757291	0.278161	3.04142	3.04142	80.0645	-4.556
MRPL4	1.39503	0.0113002	-1.64307	0.0121401	-3.03809	3.03809	217.78	-0.24804
PARP10	-3.69427	0.000451999	-0.697326	0.504663	2.99694	2.99694	81.1241	-4.39159
DNAJC27-AS1	-2.80702	1.03e-06	0.170475	0.78645	2.9775	2.9775	106.073	-2.63655
BMP1	-3.47177	0.000710124	-0.496416	0.642892	2.97536	2.97536	85.7014	-3.96819
ARRB2	-4.58718	1.18e-06	-1.61464	0.0291907	2.97254	2.97254	64.801	-6.20182
KPNA4	-2.30567	0.0209861	0.637422	0.596094	2.94309	2.94309	127.646	-1.66825
ACP5	-2.63752	1.22e-05	0.272297	0.638129	2.90981	2.90981	110.324	-2.36522
ENC1	-4.41722	1.5e-05	-1.51489	0.13056	2.90232	2.90232	65.7048	-5.93211
CARD11	-3.70779	0.000146875	-0.814345	0.341497	2.89345	2.89345	78.0369	-4.52214
MZF1	-3.70606	2.85e-10	-0.81991	0.115764	2.88615	2.88615	77.8765	-4.52597
MB	-4.04172	0.000180874	-1.1561	0.229705	2.88562	2.88562	71.3958	-5.19782
PDZK1	-3.72831	3.67e-07	-6.58702	2.81e-15	-2.8587	2.8587	76.6755	-10.3153
NF2	-3.5139	7.24e-06	-0.688982	0.409748	2.82492	2.82492	80.3927	-4.20288
XPO4	-3.10514	0.00230909	-0.283368	0.7682	2.82177	2.82177	90.8742	-3.38851
ARID3A	2.1604	0.0243922	-0.645177	0.585514	-2.80557	2.80557	129.864	1.51522
PCK1	-4.44178	3.19e-05	-1.64612	0.0803425	2.79566	2.79566	62.9401	-6.0879
chr16:57641026-57641075,-	-4.93004	4.03e-13	-2.13613	4.02e-06	2.79391	2.79391	56.6712	-7.06616
ZNF200	-2.63052	0.00233466	0.162599	0.871462	2.79312	2.79312	106.181	-2.46793
PLCE1	-5.66311	1.69e-23	-2.87521	1.31e-11	2.7879	2.7879	49.2292	-8.53831
ZNF846	-3.14886	0.000776214	-0.36307	0.721014	2.78579	2.78579	88.4698	-3.51193
BC069004	-4.10891	3.23e-10	-1.33076	0.00912619	2.77815	2.77815	67.6128	-5.43967
MCF2L	-2.64434	8.08e-05	-5.40086	1.15e-11	-2.75652	2.75652	104.242	-8.04519
chr12:127545026-127545075,+	-2.86202	0.00101996	-0.105726	0.887971	2.75629	2.75629	96.3059	-2.96774
RNF187	-2.80472	2.81e-10	-0.0510212	0.909292	2.7537	2.7537	98.1809	-2.85575
MFAP2	-5.75315	3.53e-10	-3.01462	1.13e-05	2.73853	2.73853	47.6005	-8.76777
PRMT7	-3.49354	4.54e-10	-0.755445	0.100911	2.7381	2.7381	78.376	-4.24899
chr11:65222676-65222725,+	-2.6714	0.00121358	0.0486859	0.944901	2.72009	2.72009	101.822	-2.62272
C16orf98	-3.10033	0.000319221	-0.380635	0.637164	2.71969	2.71969	87.7227	-3.48096
RAB11FIP3	-2.84737	0.00143579	-0.127884	0.91161	2.71949	2.71949	95.5087	-2.97526
CDNF	-3.02183	0.000188319	-0.311783	0.720033	2.71004	2.71004	89.6823	-3.33361
CCDC102B	-5.17026	4.78e-08	-2.46434	0.000732016	2.70591	2.70591	52.3361	-7.6346
SULT1A1	-5.28344	1.81e-09	-2.58357	0.000111538	2.69987	2.69987	51.1006	-7.86701
HRSP12	-2.42971	0.000116114	0.269189	0.64303	2.6989	2.6989	111.079	-2.16052
RWDD4	2.00024	0.00464694	-0.690748	0.444025	-2.69099	2.69099	134.533	1.30949
HSF4	-4.92844	3.43e-07	-2.23983	0.0039966	2.68862	2.68862	54.553	-7.16827
C9orf152	-2.33198	0.0177236	-5.00973	7.91e-07	-2.67774	2.67774	114.827	-7.34171
SLC25A5-AS1	2.75101	0.000110032	0.0842515	0.937641	-2.66676	2.66676	96.9374	2.83527
ZNF726	-3.54182	0.000558061	-0.877039	0.389524	2.66478	2.66478	75.2376	-4.41886
LOC100289230	-2.21314	0.00360982	0.430159	0.604808	2.6433	2.6433	119.437	-1.78298
PHLDA3	0.984212	0.0464982	-1.64708	0.00268164	-2.63129	2.63129	267.35	-0.662867
MAMSTR	-3.1504	0.000139572	-0.519213	0.548713	2.63119	2.63119	83.5191	-3.66961
BMP8A	-4.21061	0.00728873	-1.59207	0.465519	2.61854	2.61854	62.1891	-5.80267
LOC100506639	-3.48919	3.94e-05	-0.872871	0.232438	2.61632	2.61632	74.9835	-4.36206
ZNF182	-3.44348	3.07e-07	-0.829105	0.19015	2.61437	2.61437	75.9225	-4.27258
FAM194A	-2.60343	1.94e-05	-0.0268287	0.969457	2.5766	2.5766	98.9695	-2.63026
chr17:45973151-45973200,-	0.766517	0.0259913	-1.80528	8.24e-05	-2.5718	2.5718	335.518	-1.03877
MCAM	-3.89368	1.22e-09	-6.46017	1.23e-17	-2.56649	2.56649	65.9143	-10.3538
ZRANB2	-2.27319	0.00127409	0.282279	0.688658	2.55547	2.55547	112.418	-1.99091
S100P	1.65024	0.0143909	4.20274	1.49e-12	2.5525	2.5525	154.675	5.85298
H19	-7.31235	2.96e-18	-4.76076	1.94e-13	2.55159	2.55159	34.8943	-12.0731
NUDT3,RPS10-NUDT3	-2.01602	0.00757795	0.520394	0.449726	2.53642	2.53642	125.813	-1.49563
ZDHHC5	-2.72273	0.000259454	-0.188792	0.827363	2.53393	2.53393	93.0661	-2.91152
TRIM11	3.2827	0.000101139	0.751706	0.471953	-2.53099	2.53099	77.101	4.0344
MXD4	-3.20478	0.0027162	-0.676595	0.523591	2.52819	2.52819	78.888	-3.88138
TRAF3IP2-AS1	-2.92751	1.21e-09	-0.40161	0.384033	2.5259	2.5259	86.2815	-3.32912
TSPAN13	-1.4292	0.0483631	1.09217	0.0440462	2.52137	2.52137	176.418	-0.337037
ZNF154	-3.48147	6.35e-05	-0.979521	0.200522	2.50194	2.50194	71.8647	-4.46099
BC080555	-1.60346	0.021312	0.897394	0.119694	2.50086	2.50086	155.966	-0.70607
COL15A1	-4.56277	3.37e-08	-2.06808	0.000679371	2.49469	2.49469	54.6749	-6.63084
NFKBIB	1.91689	0.0140192	-0.573446	0.545145	-2.49034	2.49034	129.915	1.34345
chr16:57641051-57641100,-	-4.76573	8.32e-12	-2.27549	4.48e-06	2.49024	2.49024	52.253	-7.04123
ZNF85	-2.8034	4.66e-09	-0.313638	0.446456	2.48976	2.48976	88.8122	-3.11703
FRMD8	4.51207	5.3e-06	2.02679	0.0559462	-2.48528	2.48528	55.0807	6.53886
FAM188B	-1.79991	0.0221162	-4.28033	2.03e-07	-2.48042	2.48042	137.808	-6.08024
MCMBP	-2.08561	0.0163463	0.388567	0.653242	2.47418	2.47418	118.631	-1.69705
DPT	-2.68906	0.00470448	-5.16211	7.34e-08	-2.47305	2.47305	91.9669	-7.85117
AX747171	-5.87203	2.96e-14	-3.40802	4.57e-10	2.46401	2.46401	41.9618	-9.28005
EFEMP1	-3.55461	3.82e-10	-1.09174	0.0220201	2.46288	2.46288	69.2868	-4.64635
BANK1	1.98693	0.00920527	-0.469141	0.682632	-2.45608	2.45608	123.611	1.51779
CTNNA2	-3.31358	0.000531908	-0.858985	0.320401	2.45459	2.45459	74.0768	-4.17256
MYT1L	-3.17946	0.000293294	-0.737299	0.363955	2.44216	2.44216	76.8105	-3.91676
LPPR2	-3.035	0.00109561	-0.608513	0.520672	2.42649	2.42649	79.9502	-3.64352
SCARB1	-2.97732	0.000124404	-5.40334	1.2e-10	-2.42602	2.42602	81.4833	-8.38066
FAM171A1	-1.81523	0.0439801	0.60952	0.46917	2.42475	2.42475	133.578	-1.20571
PLXND1	-1.68024	0.0282475	0.742917	0.264241	2.42315	2.42315	144.215	-0.937321
PDZD8	2.06689	0.0134948	-0.346267	0.75624	-2.41316	2.41316	116.753	1.72062
PACS2	1.46887	0.0485738	-0.942392	0.301215	-2.41126	2.41126	164.158	0.526475
PCDHB5	-1.57463	0.0461346	0.836059	0.250435	2.41069	2.41069	153.096	-0.738571
MYLIP	3.1005	1.02e-10	0.701021	0.276856	-2.39948	2.39948	77.39	3.80152
AFAP1L2	-2.30758	0.0419105	0.0889485	0.996356	2.39652	2.39652	103.855	-2.21863
SLC17A6	-1.5301	0.0127662	-3.92341	1.15e-08	-2.39331	2.39331	156.415	-5.45351
PNLIPRP1	-3.69279	4.17e-05	-6.08176	1.17e-09	-2.38897	2.38897	64.6929	-9.77454
DOCK7	-1.96795	0.0215224	0.418511	0.639353	2.38646	2.38646	121.266	-1.54944
MAP2K6	-2.23229	0.013212	0.151306	0.891898	2.3836	2.3836	106.778	-2.08099
CRH	-5.04553	1.5e-07	-2.66555	0.000741531	2.37998	2.37998	47.1701	-7.71107
LINC00242	-2.23184	0.0170964	-4.61012	1.04e-06	-2.37829	2.37829	106.562	-6.84196
ITGB3BP	-3.07625	2.66e-07	-0.704735	0.178372	2.37151	2.37151	77.091	-3.78098
C21orf62	-5.21927	3.28e-07	-2.85343	0.00174428	2.36583	2.36583	45.3288	-8.0727
RPS15A	-1.31389	0.000963	1.04875	0.0135816	2.36264	2.36264	179.82	-0.265144
chr2:37827076-37827125,+	-5.39121	1.6e-18	-3.04699	4.97e-13	2.34422	2.34422	43.4823	-8.4382
XDH	3.44978	5.9e-05	1.10583	0.277189	-2.34395	2.34395	67.945	4.55561
KCNJ16	-2.67555	0.0177305	-0.333694	0.786155	2.34185	2.34185	87.528	-3.00924
GABRP	-5.29704	1.17e-06	-2.9566	0.00182636	2.34044	2.34044	44.1839	-8.25364
ABCC1	-2.14143	0.00137028	0.196582	0.796936	2.33801	2.33801	109.18	-1.94485
SEMA4C	-2.27023	0.0278835	0.0657588	0.962955	2.33599	2.33599	102.897	-2.20447
RPGRIP1L	-2.05919	9.53e-05	0.274968	0.620144	2.33416	2.33416	113.353	-1.78422
MCM5	-4.20965	3.67e-06	-1.88082	0.0240986	2.32883	2.32883	55.3212	-6.09048
LCLAT1	-2.00253	0.00460575	0.310487	0.66956	2.31302	2.31302	115.505	-1.69205
FOXP4	-1.61027	0.0346104	0.69838	0.29817	2.30865	2.30865	143.37	-0.911893
RNASET2	-2.12978	0.0148003	0.17568	0.824306	2.30546	2.30546	108.249	-1.9541
ZNF350	-2.24702	3.74e-05	0.056096	0.920416	2.30312	2.30312	102.496	-2.19093
CSRNP3	-4.13899	1.25e-08	-1.83619	0.00135118	2.30279	2.30279	55.6367	-5.97518
TANGO6	-2.38207	7.2e-05	-0.0877516	0.893471	2.29432	2.29432	96.3162	-2.46982
ABCC9	-3.75068	1.81e-09	-1.45688	0.00306603	2.2938	2.2938	61.1568	-5.20756
SOX4	-2.48583	6.15e-08	-0.194887	0.754745	2.29094	2.29094	92.1601	-2.68071
ERI3	-1.78768	0.016468	0.495138	0.490702	2.28282	2.28282	127.697	-1.29254
EPT1	-1.77858	2.56e-05	0.503972	0.190073	2.28255	2.28255	128.336	-1.2746
LRRC16A	-1.88301	0.0221951	0.395467	0.650515	2.27847	2.27847	121.002	-1.48754
KIAA1107	-2.13292	0.0328573	0.145407	0.893017	2.27833	2.27833	106.817	-1.98752
DEFB1	-1.50955	0.00318886	0.765321	0.176209	2.27487	2.27487	150.699	-0.744227
TTC30A	-3.24509	7.5e-07	-0.977432	0.0739674	2.26766	2.26766	69.8797	-4.22253
HDAC7	2.45703	3.2e-07	0.196	0.790405	-2.26103	2.26103	92.0229	2.65303
chr8:11659951-11660000,-	-1.55202	0.0476891	0.706621	0.258389	2.25865	2.25865	145.529	-0.845402
AK127555	-2.49288	0.0453755	-0.240667	0.820156	2.25222	2.25222	90.3459	-2.73355
HLA-DOB	2.7194	0.00509346	4.95758	1.1e-07	2.23817	2.23817	82.3039	7.67698
SLC26A6	-3.0387	0.00121061	-0.801514	0.406825	2.23719	2.23719	73.6232	-3.84022
FAM154B	-4.01278	2.01e-05	-1.7776	0.0268317	2.23518	2.23518	55.7015	-5.79038
KLKP1	-3.06394	0.000148466	-0.830007	0.346134	2.23393	2.23393	72.9104	-3.89394
BCL3	-1.48242	0.0342073	0.744292	0.252577	2.22672	2.22672	150.208	-0.738132
FLRT2	-6.51376	1.69e-13	-4.29374	4.57e-10	2.22002	2.22002	34.082	-10.8075
MPP5	-2.11879	2.4e-06	0.101206	0.842876	2.22	2.22	104.777	-2.01759
MNT	-2.35064	0.0106681	-0.130689	0.891898	2.21995	2.21995	94.4403	-2.48133
MTRNR2L1	-3.02685	1.39e-06	-0.815164	0.155122	2.21169	2.21169	73.0689	-3.84201
GAS2	-2.92983	2.55e-08	-0.724755	0.106202	2.20507	2.20507	75.2629	-3.65458
ZNF189	-3.19689	0.000141902	-1.0141	0.20799	2.18279	2.18279	68.2785	-4.21099
ATXN2	-1.81245	0.000717065	0.367153	0.493859	2.1796	2.1796	120.257	-1.4453
ZMYM1	-1.84768	0.0342077	0.322487	0.736119	2.17017	2.17017	117.454	-1.5252
FUCA2	-2.37632	7.47e-06	-0.212059	0.736119	2.16426	2.16426	91.0761	-2.58838
NAA10	-2.12276	0.000688189	0.0342274	0.956193	2.15699	2.15699	101.612	-2.08854
CASP5	2.91704	0.00375625	5.06512	2.73e-07	2.14808	2.14808	73.6393	7.98216
SEMA4A	-1.16458	0.0441975	0.981852	0.0283483	2.14643	2.14643	184.31	-0.182727
MMP16	2.76262	0.00280795	0.622385	0.586204	-2.14023	2.14023	77.4712	3.385
HGSNAT	2.37905	0.0111234	0.258419	0.853003	-2.12063	2.12063	89.1377	2.63747
DCAF4	-1.83376	0.0481977	0.285854	0.846869	2.11962	2.11962	115.588	-1.54791
BCL7B	-2.10043	0.0345773	-4.21282	3.71e-05	-2.11239	2.11239	100.57	-6.31325
R3HDM1	-2.55255	1.13e-06	-0.442788	0.358532	2.10976	2.10976	82.6531	-2.99534
GJB1	-6.58707	8.62e-15	-4.47923	1.62e-11	2.10783	2.10783	31.9996	-11.0663
LRCH1	3.4164	0.000246128	1.31146	0.205524	-2.10495	2.10495	61.613	4.72786
ZYX	-2.10078	0.00147342	0.00215007	0.984463	2.10293	2.10293	100.102	-2.09863
BAHD1	1.83642	0.0102187	-0.266213	0.776692	-2.10263	2.10263	114.496	1.57021
GIN1	-2.09611	0.000877013	0.00628051	0.996758	2.10239	2.10239	100.3	-2.08983
SYVN1	-3.17208	0.000846231	-1.07586	0.21601	2.09621	2.09621	66.0833	-4.24794
PDK3	-2.55419	9.78e-05	-0.458711	0.485403	2.09548	2.09548	82.0408	-3.0129
ADCY10	-2.53776	0.000600446	-0.44247	0.520306	2.09529	2.09529	82.5645	-2.98023
JB137816	-2.41908	7.81e-08	-0.324609	0.495753	2.09447	2.09447	86.5813	-2.74369
FBXO2	-1.99867	0.0206778	0.0870285	0.94209	2.0857	2.0857	104.354	-1.91164
COL14A1	-3.67012	2.3e-07	-5.74812	6.66e-13	-2.07801	2.07801	56.6196	-9.41824
TMEM184A	-1.88425	0.0194399	0.191355	0.816852	2.0756	2.0756	110.156	-1.69289
VASP	-1.78174	0.00612259	0.29244	0.686479	2.07418	2.07418	116.413	-1.4893
BIK	-3.64684	0.000124522	-1.57388	0.0733468	2.07297	2.07297	56.8428	-5.22072
SPIRE1	-4.15203	0.000541169	-2.07917	0.0843921	2.07287	2.07287	49.9241	-6.2312
COL6A3	-4.18527	1.94e-09	-2.12069	0.000504642	2.06457	2.06457	49.3295	-6.30596
ITGB4	-2.11713	0.0204235	-0.0536984	0.919463	2.06343	2.06343	97.4636	-2.17083
RBKS	-2.5232	9.48e-09	-0.460113	0.293269	2.06309	2.06309	81.7647	-2.98332
AL133568	-2.24302	0.000424778	-0.189807	0.777327	2.05321	2.05321	91.5379	-2.43282
chr1:40723626-40723675,-	-1.32862	0.0383612	0.72137	0.131306	2.04999	2.04999	154.295	-0.607248
SPG7	-1.92866	0.0152512	0.118459	0.91161	2.04712	2.04712	106.142	-1.8102
BC031876	-1.60325	0.0331377	0.442545	0.572435	2.04579	2.04579	127.603	-1.1607
SERPIND1	-4.92097	0.000293294	-2.87681	0.0758351	2.04416	2.04416	41.5397	-7.79778
ZNF446	1.92399	0.0479358	-0.119451	0.938679	-2.04344	2.04344	106.208	1.80454
SLC4A8	-1.46502	0.0180875	-3.50753	1.34e-07	-2.04251	2.04251	139.419	-4.97255
LINC00475	2.82224	0.00339929	4.86024	1.34e-07	2.038	2.038	72.2122	7.68248
ZNF790-AS1	-1.09261	0.0219218	0.941921	0.0155292	2.03453	2.03453	186.208	-0.150688
PRDM16	2.02932	5.48e-05	-0.00504827	0.99066	-2.03437	2.03437	100.249	2.02428
ZNF594	-3.94504	9.17e-08	-1.92079	0.00174781	2.02424	2.02424	51.3111	-5.86583
B9D2	1.39288	0.00753682	-0.630757	0.281964	-2.02363	2.02363	145.285	0.762119
TBC1D20	-2.44402	0.00475819	-0.423872	0.664382	2.02015	2.02015	82.6568	-2.8679
AK097190	-1.61253	0.00702568	0.403329	0.48804	2.01586	2.01586	125.012	-1.2092
CDK9	-2.08186	1.29e-05	-0.0662372	0.914777	2.01562	2.01562	96.8184	-2.1481
PRTFDC1	-2.24908	8.78e-05	-0.238896	0.703364	2.01018	2.01018	89.378	-2.48797
PITHD1	-2.75373	3.84e-05	-0.743807	0.217476	2.00992	2.00992	72.9891	-3.49753
